# Supplementary material for: Multi-Omics Integrated Analysis of the Protective Effect of Tertiary Lymphoid Structures and Associated Key Regulatory Genes in Human Gallbladder Cancer
Source: Research Square preprint supplement (doi:10.21203/rs.3.rs-6564288/v1), 2025-06-09
Supplement: Supplementary file 1 [file 2740b1935d97d4ff500b2c6f.docx]

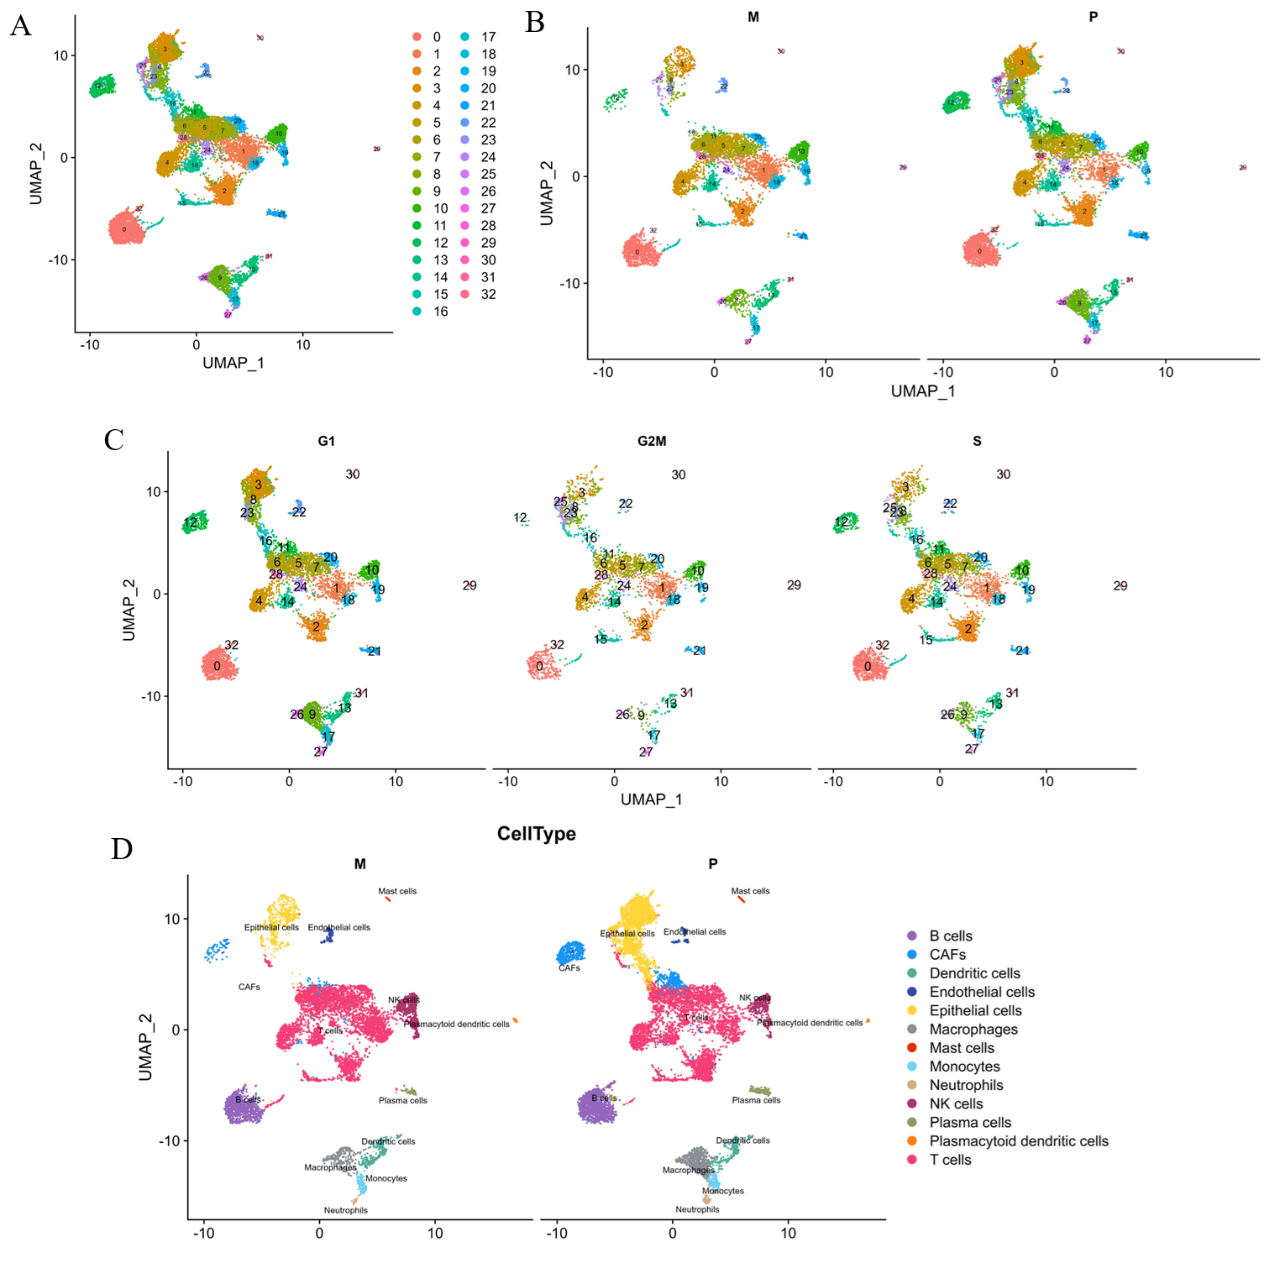


**Supplementary Fig.1 Single cell RNA sequencing analysis for the heterogeneity and distinct subgroups between primary and metastatic focuses of GBC patients.** UMAP dimensionality reduction clustering analysis in (A) overall samples, (B) different groups, (C) different cell cycle phases, and (D) cell types in different groups.


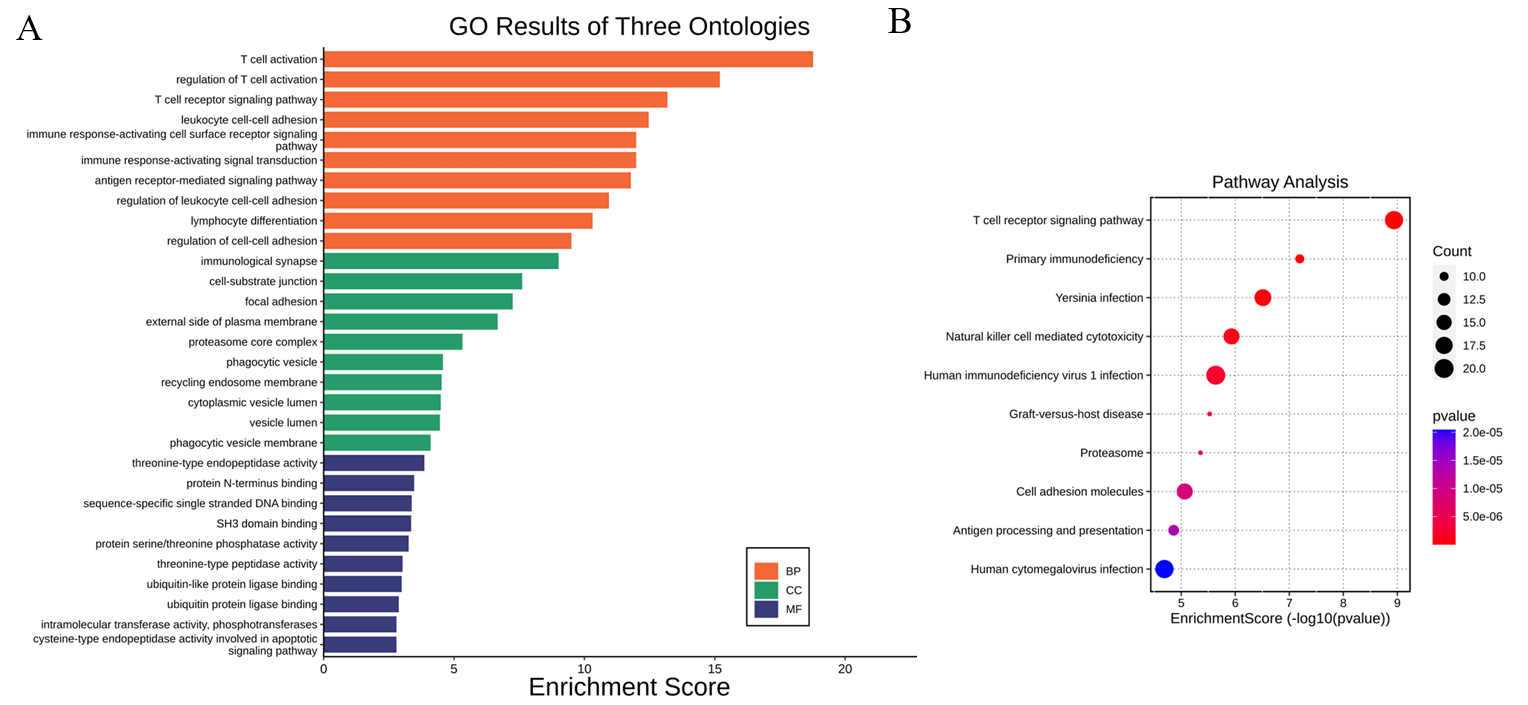


**Supplementary Fig.2 (A) GO and (B) KEGG analyses for the DEGs in clusters 2, 9 and 21.**

**
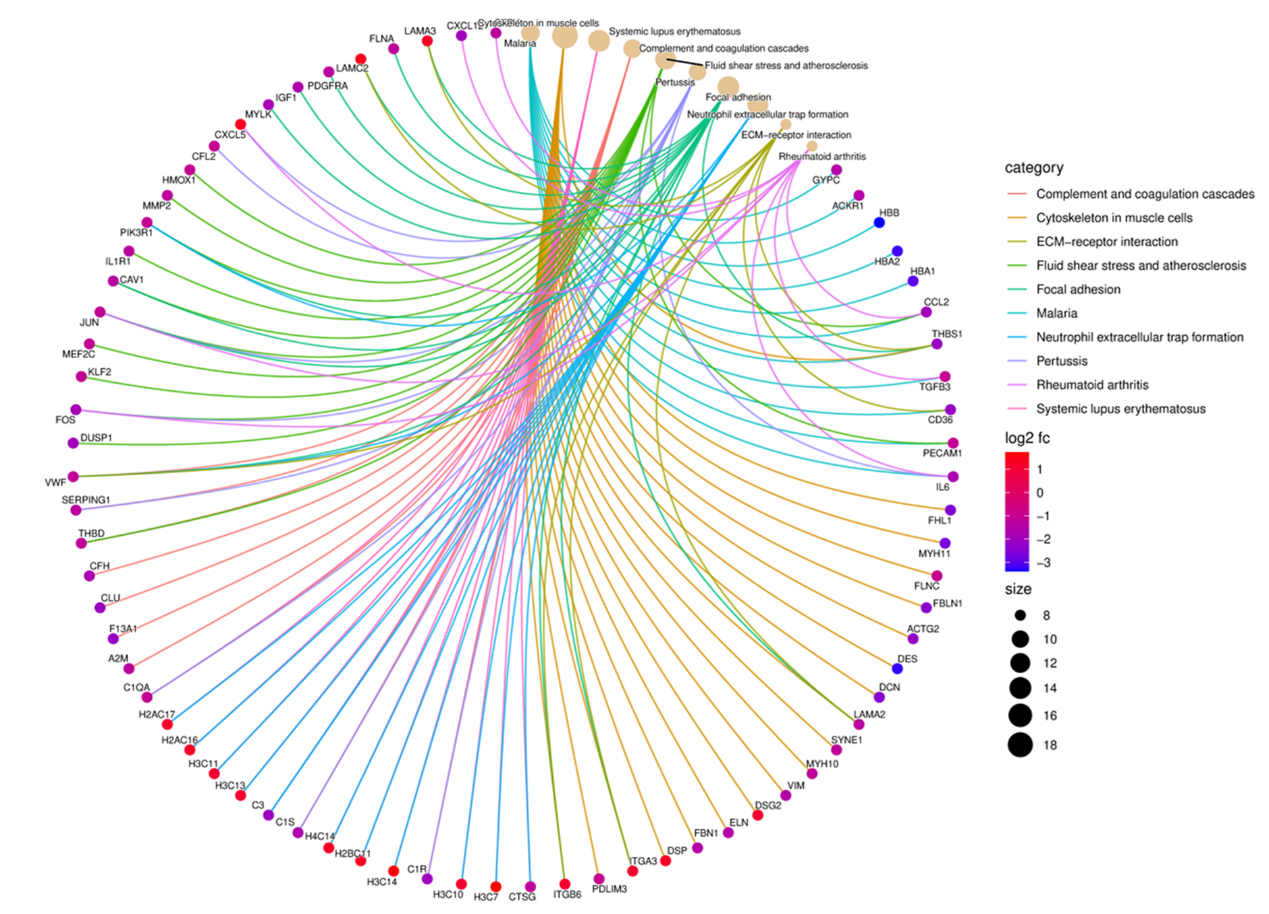
**

**Supplementary Fig.3 KEGG pathway annotations for** **genes CTSG, FLNC, CCNB1, HSPB8, NR4A1 and MYLK based on the Gene Set Enrichment Analysis** **(GSEA).**
